# Supplementary material
Source: publisher figshare collection journal article supplement (https://acs.figshare.com/ndownloader/files/13590578)
Supplement: Supplementary file 1 [file 13590578]

**Permission Request Form for Use of Individual and/or Group Photos  
in ACS LiveSlides from Copyright Owners/Publishers/Photographers  
Other Than ACS**

Date: NOV 06, 2018

To: Prof. George C. Schatz  
Publisher's/Copyright Owner's Contact Information  
Editor for JPCL  
Department of Chemistry  
Northwestern Uni. 2145  
Evanston IL 60208-3113  
Publisher's/Copyright Owner's Email Address

From: Achintya Kundu  
Your Name and Complete Mailing Address  
Max Born Institute  
Max Born Str. 2A  
12489 Berlin Germany  
Your Phone Number Including Country and City Codes  
+49 174 876 1124  
Your Email Address  
Kundu@mbi-berlin.de  
Your Specific Deadline Date

I am preparing an ACS LiveSlides entitled: How Molecular Crowding Differs from  
macromolecular crowding: A femtosecond Mid-Infrared Pump-Probe Study  
to appear with The Journal of Physical Chemistry Letters

Title of ACS Publication and DOI DOI: 10.1021/acs.jpcl.1c00315

which is published by the American Chemical Society, a not-for-profit membership society and a STM signatory.

I would appreciate your permission to use the following material in all formats including but not limited to print, microform, electronic, and/or CD-ROM from the following reference:

**Individual Photographs of the Following Individuals:**

\_\_\_\_\_  
\_\_\_\_\_  
\_\_\_\_\_

**Collective Photograph (s) representing the following groups:**

\_\_\_\_\_  
\_\_\_\_\_  
\_\_\_\_\_

If you, the photographer, have a required **credit line**, please include it below:

\_\_\_\_\_  
\_\_\_\_\_

For your convenience, you may sign and date the bottom of this letter to indicate your agreement. Please return this form to me at the above email address, by the above **deadline date** (if given above). Thank you.

Agreed: Minghuang Chen Date: Nov. 6, 2018  
Publisher's/Copyright Owner's Signature or Stamp Date

Submit completed and signed form with your signed ACS LiveSlides Video Release. 7/25/16
