# Supplementary material
Source: publisher figshare collection journal article supplement (https://acs.figshare.com/ndownloader/files/13590578)
Supplement: Supplementary file 4 [file 13590578]

Archive with 5 entries (5 files):
- info.xml
- jz8b03153_high_quality.mp4
- 1016.pdf
- 1700.pdf
- jz8b03153.pdf
