# Supplementary material
Source: publisher figshare collection journal article supplement (https://acs.figshare.com/ndownloader/files/13590578)
Supplement: Supplementary file 4 [file 13590578 › info.xml]

<presentation>
	<article>
		<title>How Molecular Crowding Differs from Macromolecular Crowding: A Femtosecond Mid-Infrared PumpProbe Study</title>
		<doi>10.1021/acs.jpclett.8b03153</doi>
		<copyright>American Chemical Society</copyright>
		<narrator>Achintya Kundu</narrator>
		<contact>Prof. Minhaeng Cho</contact>
		<contact-email>mcho@korea.ac.kr, achintya2007@gmail.com</contact-email>
		<author-list>
			<author>Minhaeng Cho</author>
		</author-list>
	</article>
	<slides height-width-ratio=".75">
		<slide audio-time="23">
			<subtitle/>
		</slide>
		<slide audio-time="75">
			<subtitle/>
		</slide>
		<slide audio-time="76">
			<subtitle/>
		</slide>
		<slide audio-time="171">
			<subtitle/>
		</slide>
		<slide audio-time="140">
			<subtitle/>
		</slide>
		<slide audio-time="68">
			<subtitle/>
		</slide>
		<slide audio-time="97">
			<subtitle/>
		</slide>
		<slide audio-time="101">
			<subtitle/>
		</slide>
	</slides>
	<audio duration="751"/>
</presentation>
